# Supplementary material for: Cerebral Folate Deficiency, Folate Receptor Alpha Autoantibodies and Leucovorin (Folinic Acid) Treatment in Autism Spectrum Disorders: A Systematic Review and Meta-Analysis
Source: MDPI journal article supplement (doi:10.3390/jpm11111141), 2021-11-03
Supplement: s1 [file s1]

Table S1. PRISMA Checklist

| Section and Topic             | Item # | Checklist item                                                                                                                                                                                                                                                                                       | Location where item is reported |
|-------------------------------|--------|------------------------------------------------------------------------------------------------------------------------------------------------------------------------------------------------------------------------------------------------------------------------------------------------------|---------------------------------|
| <b>TITLE</b>                  |        |                                                                                                                                                                                                                                                                                                      |                                 |
| Title                         | 1      | Identify the report as a systematic review.                                                                                                                                                                                                                                                          | Page 1                          |
| <b>ABSTRACT</b>               |        |                                                                                                                                                                                                                                                                                                      |                                 |
| Abstract                      | 2      | See the PRISMA 2020 for Abstracts checklist.                                                                                                                                                                                                                                                         | Page 1                          |
| <b>INTRODUCTION</b>           |        |                                                                                                                                                                                                                                                                                                      |                                 |
| Rationale                     | 3      | Describe the rationale for the review in the context of existing knowledge.                                                                                                                                                                                                                          | Page 1-3                        |
| Objectives                    | 4      | Provide an explicit statement of the objective(s) or question(s) the review addresses.                                                                                                                                                                                                               | Page 3                          |
| <b>METHODS</b>                |        |                                                                                                                                                                                                                                                                                                      |                                 |
| Eligibility criteria          | 5      | Specify the inclusion and exclusion criteria for the review and how studies were grouped for the syntheses.                                                                                                                                                                                          | Sec 2.2                         |
| Information sources           | 6      | Specify all databases, registers, websites, organisations, reference lists and other sources searched or consulted to identify studies. Specify the date when each source was last searched or consulted.                                                                                            | Sec 2.1                         |
| Search strategy               | 7      | Present the full search strategies for all databases, registers and websites, including any filters and limits used.                                                                                                                                                                                 | Sec 2.1                         |
| Selection process             | 8      | Specify the methods used to decide whether a study met the inclusion criteria of the review, including how many reviewers screened each record and each report retrieved, whether they worked independently, and if applicable, details of automation tools used in the process.                     | Sec 2.2                         |
| Data collection process       | 9      | Specify the methods used to collect data from reports, including how many reviewers collected data from each report, whether they worked independently, any processes for obtaining or confirming data from study investigators, and if applicable, details of automation tools used in the process. | Sec 2.2                         |
| Data items                    | 10a    | List and define all outcomes for which data were sought. Specify whether all results that were compatible with each outcome domain in each study were sought (e.g. for all measures, time points, analyses), and if not, the methods used to decide which results to collect.                        | Sec 2.2                         |
|                               | 10b    | List and define all other variables for which data were sought (e.g. participant and intervention characteristics, funding sources). Describe any assumptions made about any missing or unclear information.                                                                                         | Sec 2.2                         |
| Study risk of bias assessment | 11     | Specify the methods used to assess risk of bias in the included studies, including details of the tool(s) used, how many reviewers assessed each study and whether they worked independently, and if applicable, details of automation tools used in the process.                                    | Sec 2.2                         |
| Effect measures               | 12     | Specify for each outcome the effect measure(s) (e.g. risk ratio, mean difference) used in the synthesis or presentation of results.                                                                                                                                                                  | Sec 2.3                         |
| Synthesis methods             | 13a    | Describe the processes used to decide which studies were eligible for each synthesis (e.g. tabulating the study intervention characteristics and comparing against the planned groups for each synthesis                                                                                             | Sec 2.2, 2.3                    |

| Section and Topic             | Item # | Checklist item                                                                                                                                                                                                                                                                       | Location where item is reported |
|-------------------------------|--------|--------------------------------------------------------------------------------------------------------------------------------------------------------------------------------------------------------------------------------------------------------------------------------------|---------------------------------|
|                               |        | (item #5)).                                                                                                                                                                                                                                                                          |                                 |
|                               | 13b    | Describe any methods required to prepare the data for presentation or synthesis, such as handling of missing summary statistics, or data conversions.                                                                                                                                | Sec 2.3                         |
|                               | 13c    | Describe any methods used to tabulate or visually display results of individual studies and syntheses.                                                                                                                                                                               | Sec 2.3                         |
|                               | 13d    | Describe any methods used to synthesize results and provide a rationale for the choice(s). If meta-analysis was performed, describe the model(s), method(s) to identify the presence and extent of statistical heterogeneity, and software package(s) used.                          | Sec 2.3                         |
|                               | 13e    | Describe any methods used to explore possible causes of heterogeneity among study results (e.g. subgroup analysis, meta-regression).                                                                                                                                                 | Sec 2.3                         |
|                               | 13f    | Describe any sensitivity analyses conducted to assess robustness of the synthesized results.                                                                                                                                                                                         | Sec 2.3                         |
| Reporting bias assessment     | 14     | Describe any methods used to assess risk of bias due to missing results in a synthesis (arising from reporting biases).                                                                                                                                                              | Sec 2.3                         |
| Certainty assessment          | 15     | Describe any methods used to assess certainty (or confidence) in the body of evidence for an outcome.                                                                                                                                                                                | Sec 2.3                         |
| <b>RESULTS</b>                |        |                                                                                                                                                                                                                                                                                      |                                 |
| Study selection               | 16a    | Describe the results of the search and selection process, from the number of records identified in the search to the number of studies included in the review, ideally using a flow diagram.                                                                                         | Sec 2.2, Fig 1                  |
|                               | 16b    | Cite studies that might appear to meet the inclusion criteria, but which were excluded, and explain why they were excluded.                                                                                                                                                          | Sec 2.2                         |
| Study characteristics         | 17     | Cite each included study and present its characteristics.                                                                                                                                                                                                                            | Supplementary material          |
| Risk of bias in studies       | 18     | Present assessments of risk of bias for each included study.                                                                                                                                                                                                                         | Sec 2.2                         |
| Results of individual studies | 19     | For all outcomes, present, for each study: (a) summary statistics for each group (where appropriate) and (b) an effect estimate and its precision (e.g. confidence/credible interval), ideally using structured tables or plots.                                                     | Tables 1-3                      |
| Results of syntheses          | 20a    | For each synthesis, briefly summarise the characteristics and risk of bias among contributing studies.                                                                                                                                                                               | Sec 3.1<br>Sec 3.2.             |
|                               | 20b    | Present results of all statistical syntheses conducted. If meta-analysis was done, present for each the summary estimate and its precision (e.g. confidence/credible interval) and measures of statistical heterogeneity. If comparing groups, describe the direction of the effect. | Tables 1-3                      |
|                               | 20c    | Present results of all investigations of possible causes of heterogeneity among study results.                                                                                                                                                                                       | Tables 1-3                      |
|                               | 20d    | Present results of all sensitivity analyses conducted to assess the robustness of the synthesized results.                                                                                                                                                                           | Tables 1-3                      |
| Reporting biases              | 21     | Present assessments of risk of bias due to missing results (arising from reporting biases) for each                                                                                                                                                                                  | N/A                             |

| Section and Topic                              | Item # | Checklist item                                                                                                                                                                                                                             | Location where item is reported |
|------------------------------------------------|--------|--------------------------------------------------------------------------------------------------------------------------------------------------------------------------------------------------------------------------------------------|---------------------------------|
|                                                |        | synthesis assessed.                                                                                                                                                                                                                        |                                 |
| Certainty of evidence                          | 22     | Present assessments of certainty (or confidence) in the body of evidence for each outcome assessed.                                                                                                                                        | Sec 3.1.<br>Sec 3.2.            |
| <b>DISCUSSION</b>                              |        |                                                                                                                                                                                                                                            |                                 |
| Discussion                                     | 23a    | Provide a general interpretation of the results in the context of other evidence.                                                                                                                                                          | Page 15                         |
|                                                | 23b    | Discuss any limitations of the evidence included in the review.                                                                                                                                                                            | Page 19-20                      |
|                                                | 23c    | Discuss any limitations of the review processes used.                                                                                                                                                                                      | Page 20                         |
|                                                | 23d    | Discuss implications of the results for practice, policy, and future research.                                                                                                                                                             | Sec 5                           |
| <b>OTHER INFORMATION</b>                       |        |                                                                                                                                                                                                                                            |                                 |
| Registration and protocol                      | 24a    | Provide registration information for the review, including register name and registration number, or state that the review was not registered.                                                                                             | Not Registered                  |
|                                                | 24b    | Indicate where the review protocol can be accessed, or state that a protocol was not prepared.                                                                                                                                             | Not Registered                  |
|                                                | 24c    | Describe and explain any amendments to information provided at registration or in the protocol.                                                                                                                                            | Not Registered                  |
| Support                                        | 25     | Describe sources of financial or non-financial support for the review, and the role of the funders or sponsors in the review.                                                                                                              | Page 20                         |
| Competing interests                            | 26     | Declare any competing interests of review authors.                                                                                                                                                                                         | Page 20                         |
| Availability of data, code and other materials | 27     | Report which of the following are publicly available and where they can be found: template data collection forms; data extracted from included studies; data used for all analyses; analytic code; any other materials used in the review. | Page 3-4                        |

Table S2. Studies on Children with CFD where ASD was found to be a characteristic

| Study, year                                      | Children                                        | Study and dose                                                                        | Outcomes                                                                                                                                                  | Etiology                                                                                               | Comment                                                                   |
|--------------------------------------------------|-------------------------------------------------|---------------------------------------------------------------------------------------|-----------------------------------------------------------------------------------------------------------------------------------------------------------|--------------------------------------------------------------------------------------------------------|---------------------------------------------------------------------------|
| Ramaekers et al., 2004 (Ramaekers and Blau 2004) | 20 children with CFD (7 with ASD), ages 2-17 yo | Prospective, open label, <i>d,l</i> -leucovorin 0.5-1 mg/kg/day for at least one year | Treatment normalized 5MTHF CSF levels in 18 patients (90%); In children under 6 yo, "marked neurological recovery and cessation of seizures" was observed | No mutations in exons of genes for FRa, FRb; FRa autoantibodies not measured; Mitochondrial not tested | Transient tics and agitation in 2 children (10%); no other adverse events |
| Ramaekers et al., 2005                           | 28 patients with CFD, ages 2-19                 | Prospective, open label, <i>d,l</i> -                                                 | One patient with ASD "recovered completely." Two                                                                                                          | FRa Positive in 4 of 5 children with ASD (80%);                                                        |                                                                           |

|                                                          |                                                                                                         |                                                                   |                                                                                                                                                         |                                                                                                                               |                                                                                           |
|----------------------------------------------------------|---------------------------------------------------------------------------------------------------------|-------------------------------------------------------------------|---------------------------------------------------------------------------------------------------------------------------------------------------------|-------------------------------------------------------------------------------------------------------------------------------|-------------------------------------------------------------------------------------------|
| (Ramaekers, Rothenberg et al. 2005)                      | yo; 5 patients with ASD                                                                                 | leucovorin 0.5-1 mg/kg/day                                        | other children with ASD had improvements in communication skills and neurologic abnormalities.                                                          | Folate Gene Not Sequenced; Mitochondrial not tested                                                                           |                                                                                           |
| Moretti et al., 2008 (Moretti, Peters et al. 2008)       | 7 children with CFD; 5 that could be evaluated for ASD were positive; assessment no possible in other 2 | <i>d,l</i> -leucovorin 0.5-1 mg/kg/day                            | Increases in CSF 5MTHF levels; cognitive, motor, social and neurological improvements; reductions in seizures; 3 patients with no clinical improvements | FR $\alpha$ Ab not tested<br>Mitochondrial not tested<br>No mutations in exons of genes for Fra, FRb, PCFT, MTHFR, DHFR, FTCD | One child in this study previously reported (Moretti, Sahoo et al. 2005)                  |
| Ramaekers et al., 2008 (Ramaekers, Sequeira et al. 2008) | 24 children with CFD, 10 had ASD                                                                        | Prospective, open label, <i>d,l</i> -leucovorin 0.5-2.5 mg/kg/day | 5MTHF in CSF normalized; clinical improvements                                                                                                          | Blocking FR $\alpha$ Positive in 10 of 10 with ASD (100%)                                                                     | Additional improved beyond <i>d,l</i> -leucovorin by using a milk free diet               |
| Al-Baradie et al., 2014 (Al-Baradie and Chaudhary 2014)  | 2 children with CFD, 1 with ASD                                                                         | <i>d,l</i> -leucovorin, 0.75-1.7 mg/kg/day                        | Child became seizure-free and improvements in social interaction and gait; breakthrough seizure when he ran out of <i>d,l</i> -leucovorin for 2 weeks   | Homozygous novel mutation c.398C>A (p.Pro133His) in the FOLR1 gene; FR $\alpha$ Ab not tested<br>Mitochondrial not tested     | Other child without ASD had “dramatic EEG and neurological improvement like her brother.” |

Table S3. Studies on Children with ASD where CSF was measured for possible CFD

| Study, year                                          | Children                                                                        | Study and dose                                                | Outcomes                                                                                                                                                                              | Etiology                                                                                                 |
|------------------------------------------------------|---------------------------------------------------------------------------------|---------------------------------------------------------------|---------------------------------------------------------------------------------------------------------------------------------------------------------------------------------------|----------------------------------------------------------------------------------------------------------|
| Ramaekers et al., 2007 (Ramaekers, Blau et al. 2007) | 25 children with early-onset and low functioning ASD, ages 2-12 yo; 23 with CFD | Prospective, open label, <i>d,l</i> -leucovorin 1-3 mg/kg/day | 5MTHF in CSF normalized; 2 children “cured with full recovery from ASD and neurological deficits.” Improvements in social interaction (31%), communication (69%) and stereotypy (46%) | Blocking FR $\alpha$ Positive in 19 of 23 children with CFD (83%); no mutations in exons of Fra and FRb. |
| Moretti et al., 2005 (Moretti, Sahoo et al. 2005)    | 6 yo girl with ASD                                                              | <i>d,l</i> -leucovorin, 0.5-1 mg/kg/day                       | CSF 5MTHF normalized; improvements in motor skills and neurological findings                                                                                                          | No mutations in RFC, FBP1; ETC function unremarkable; FR $\alpha$ not tested                             |

|                                                     |                                                                                                                                       |                                     |                                                                                                                                         |                                                                                                             |
|-----------------------------------------------------|---------------------------------------------------------------------------------------------------------------------------------------|-------------------------------------|-----------------------------------------------------------------------------------------------------------------------------------------|-------------------------------------------------------------------------------------------------------------|
| Frye et al., 2011 (Frye and Naviaux 2011)           | 5 children with regressive autistic disorder and Complex IV Overactivity, 2 with CSF testing (without folate supplementation) had CFD | <i>d,l</i> -leucovorin, 2 mg/kg/day | Improvements in expressive and receptive language and attention in one child with FRα autoantibodies                                    | Complex IV Overactivity<br>Folate Genes Not Sequenced<br>Fab positive in one and negative in other          |
| Shoffner et al 2010 (Shoffner, Hyams et al. 2010).  | 28 children with ASD and mitochondrial disease, 22 with CSF measurements                                                              | Not Treated                         |                                                                                                                                         | All with mitochondrial disease.<br>Folate Genes Sequencing not reported<br>FRAT Measurement not reported    |
| Frye et al., 2013 (Frye, Sequeira et al. 2013)      | 98 children with autism spectrum disorder, 16 with CSF measurements                                                                   | <i>d,l</i> -leucovorin, 2 mg/kg/day | 0 of 16 (0%) had CFD but all CSF 5-MTHF values were below average.                                                                      | Folate Genes Not Sequenced<br>All patient that underwent CSF measurements were Fab positive.                |
| Shoffner et al 2016 (Shoffner, Trommer et al. 2016) | 67 children with autistic disorder, 2y-11y, overall 11 with CFD.                                                                      | Not Treated                         | 5 of 67 (7%) had CFD on first examination and 1-3 years later 7 of 31 (23%) had CFD. Overall, 11 of 67 had CFD at some time point (16%) | Mitochondrial Activity Not Measured;<br>Folate Genes Not Sequenced; FRAT Measured using non-validated assay |
| Ramaekers et al., 2020 (Ramaekers,                  | 38 children with autism (mean age 7.25±3.9 yo)                                                                                        | Not Treated                         | 8/38 (21%) had CFD                                                                                                                      | FRAT positive in 26/38 (68%)                                                                                |

|                                                       |                          |                                                                                                                                                                                  |                                                                                                                                                                                                    |                                                                                                            |
|-------------------------------------------------------|--------------------------|----------------------------------------------------------------------------------------------------------------------------------------------------------------------------------|----------------------------------------------------------------------------------------------------------------------------------------------------------------------------------------------------|------------------------------------------------------------------------------------------------------------|
| Sequeira et al. 2020)                                 |                          |                                                                                                                                                                                  |                                                                                                                                                                                                    |                                                                                                            |
| Kanmaz et al 2021<br><br>(Kanmaz, Simsek et al. 2021) | 1 Child with CFD and ASD | <i>d,l</i> -leucovorin, 0.5-9.0 mg/kg/day orally, then <i>d,l</i> -leucovorin, 6mg/kg Q6 x 1d IV monthly for 6 months then <i>d,l</i> -leucovorin, 6mg/kg IV weekly for 6 months | CSF folate level normalized and severity and frequency of seizures decreased. Eye contact, gross motor and cognitive skills significantly improved; Valproic acid, clonazepam and rufinamide added | Homozygous missense (c.655A>G) in the FOLR1 gene;<br>FR $\alpha$ Ab not tested<br>Mitochondrial not tested |

Table S4. Studies of FR $\alpha$  autoantibodies in ASD, by year published

| Study                                                                                            | ASD Child % Blocking, Average (SD) Titer | ASD Child %Binding Average (SD) Titer | ASD Child % Either | Parent % Blocking Average (SD) Titer | Parent %Binding Average (SD) Titer | Parent %Either Average (SD) Titer | Sibling %Blocking Average (SD) Titer | Sibling %Binding Average (SD) Titer | Sibling %Either | Control % Blocking Average (SD) Titer | Control %Binding Average (SD) Titer | Control % Either |
|--------------------------------------------------------------------------------------------------|------------------------------------------|---------------------------------------|--------------------|--------------------------------------|------------------------------------|-----------------------------------|--------------------------------------|-------------------------------------|-----------------|---------------------------------------|-------------------------------------|------------------|
| Frye et al., 2013 (Frye, Sequeira et al. 2013)<br>Frye et al., 2014 (Frye, Sequeira et al. 2014) | 56/93 (60%)<br>0.36 (0.40)               | 41/93 (44%)<br>0.55 (0.73)            | 70/93 (75%)        | 10/27 (37%)<br>0.11 (0.15)           | 2/27 (7%)<br>0.13 (0.23)           | 12/27 (44%)                       | 1/6 (17%)<br>0.07 (0.143)            | 1/6 (17%)<br>0.15 (0.26)            | 2/6 (33%)       |                                       |                                     |                  |
| Ramaekers et al., 2013 (Ramaekers, Quadros et al. 2013)                                          | 35/75 (47%)<br>0.21 (0.27)               |                                       |                    | Mom 19/74 (26%)<br>Dad 9/50 (18%)    |                                    |                                   |                                      |                                     |                 | Child *1/30<br>3%<br>Mom 1/30 (3%)    |                                     |                  |

|                                                                                                                                                                      |                                  |                                  |                                                |                                                                  |                                                                  |                                                                                                                  |                                  |                                  |                |                                                    |                                  |                                            |
|----------------------------------------------------------------------------------------------------------------------------------------------------------------------|----------------------------------|----------------------------------|------------------------------------------------|------------------------------------------------------------------|------------------------------------------------------------------|------------------------------------------------------------------------------------------------------------------|----------------------------------|----------------------------------|----------------|----------------------------------------------------|----------------------------------|--------------------------------------------|
|                                                                                                                                                                      |                                  |                                  |                                                |                                                                  |                                                                  |                                                                                                                  |                                  |                                  |                | Dad<br>1/30<br>(3%)                                |                                  |                                            |
| Frye et al.,<br>2016 (Frye,<br>Delhey et al.<br>2016)<br>Frye et al.,<br>2017 (Frye,<br>Wynne et al.<br>2017)<br>Frye et al 2018<br>(Frye, Slattery<br>et al. 2018). | 16/94<br>(17%)<br>0.09<br>(0.24) | 48/94<br>(51%)<br>(0.44)<br>0.63 | 54/94<br>(58%)                                 |                                                                  |                                                                  |                                                                                                                  |                                  |                                  |                |                                                    |                                  |                                            |
| Quadros et al.,<br>2018<br>(Quadros,<br>Sequeira et al.<br>2018)                                                                                                     | 33/81<br>(41%)<br>3.01<br>(4.95) | 44/82<br>(54%)<br>0.27<br>(0.32) | 62/82<br>(76%)                                 | Mom<br>21/70<br>(31%)<br>Dad<br>29/65<br>(45%)<br>0.11<br>(0.15) | Mom<br>25/70<br>(36%)<br>Dad<br>29/65<br>(45%)<br>0.13<br>(0.23) | Mom<br>41/70<br>(59%)<br>Dad 45/65<br>(69%)                                                                      | 23/53<br>(44%)<br>2.78<br>(4.89) | 29/53<br>(55%)<br>0.28<br>(0.35) | 40/53<br>(75%) | 2/52<br>(4%)<br>0.08<br>(0.04)                     | 14/52<br>(27%)<br>0.11<br>(0.21) | 15/52<br>(29%)                             |
| Ramaekers et<br>al., 2019<br>(Ramaekers,<br>Sequeira et al.<br>2019)                                                                                                 |                                  |                                  | (1)<br>60/84<br>(71%)<br>(2)<br>62/82<br>(76%) |                                                                  |                                                                  | Cohort 1<br>30.8%<br>Maternal,<br>27.4%<br>Paternal<br>Cohort 2<br>**Mom<br>23/66<br>(35%)<br>Dad 18/66<br>(27%) |                                  |                                  |                |                                                    |                                  | DD<br>1/30<br>(3%)                         |
| Ramaekers et<br>al., 2020<br>(Ramaekers,<br>Sequeira et al.<br>2020)                                                                                                 | 26/38<br>(68%)                   | 6/17<br>(35%)                    |                                                |                                                                  |                                                                  | 12/29<br>(41%)                                                                                                   |                                  |                                  |                |                                                    |                                  | 1/30<br>(3%)                               |
| <b>Total</b>                                                                                                                                                         | 140/343<br>(41%)                 | 133/269<br>(49%)                 | 248/351<br>(71%)                               | All<br>88/286<br>(31%)<br>Mom<br>40/144<br>(28%)                 | All 56/162<br>(35%)<br>Mom<br>25/70<br>(36%)                     | All<br>139/294<br>(47%)<br>Mom<br>64/136<br>(47%)                                                                | 24/59<br>(41%)                   | 30/59<br>(51%)                   | 42/59<br>(71%) | DD Child<br>1/30<br>(3%)<br>DD Mom<br>1/30<br>(3%) | TD 14/52<br>(27%)                | TD<br>15/52<br>(29%)<br>DD<br>1/30<br>(3%) |

|  |  |  |  |                        |                       |                        |  |  |  |                                                    |  |  |
|--|--|--|--|------------------------|-----------------------|------------------------|--|--|--|----------------------------------------------------|--|--|
|  |  |  |  | Dad<br>38/115<br>(33%) | Dad<br>29/65<br>(45%) | Dad<br>63/131<br>(48%) |  |  |  | DD Dad<br>1/30<br>(3%)<br>TD Child<br>2/52<br>(4%) |  |  |
|--|--|--|--|------------------------|-----------------------|------------------------|--|--|--|----------------------------------------------------|--|--|

\* Controls for this study had developmental delays; \*\*values derived from Table 2 of publication

Table S5. Response to d,l-leucovorin in children with CFD with and without ASD (Total cases with symptoms / total Responses)

|                           | Ramaekers et al 2008<br>(Ramaekers, Sequeira<br>et al. 2008) |                      | Ramaekers<br>et al 2007<br>(Ramaekers<br>, Blau et al.<br>2007) | Moretti et al 2008<br>(Moretti, Peters et al.<br>2008) |                    | Ramaekers<br>et al 2005<br>(Ramaekers,<br>Rothenberg et al.<br>2005) |                    | Al-Baradie et al<br>2014 (Al-Baradie and<br>Chaudhary 2014) |                 | Kanmaz et al<br>2021(Kanmaz<br>, Simsek et al.<br>2021) |
|---------------------------|--------------------------------------------------------------|----------------------|-----------------------------------------------------------------|--------------------------------------------------------|--------------------|----------------------------------------------------------------------|--------------------|-------------------------------------------------------------|-----------------|---------------------------------------------------------|
|                           | ASD<br>(n=10)                                                | No ASD<br>(n=14)     | All ASD<br>(n=25)                                               | ASD<br>(n=5)                                           | No ASD<br>(n=2)    | ASD<br>(n=5)                                                         | No ASD<br>(n=23)   | ASD<br>(n=1)                                                | No ASD<br>(n=1) | ASD<br>(n=1)                                            |
| Dose                      | 0.5-2.5<br>mg/kg/day                                         | 0.5-2.5<br>mg/kg/day | 1-3<br>mg/kg/day                                                | 0.5-1<br>mg/kg/day                                     | 0.5-1<br>mg/kg/day | 0.5-1<br>mg/kg/day                                                   | 0.5-1<br>mg/kg/day | 0.75-1.7<br>mg/kg/day                                       | 2<br>mg/kg/day  | 6mg/kg IV<br>weekly                                     |
| Irritability/Unrest/Sleep | 10/4                                                         | 9/2                  | 17/12                                                           |                                                        | 1 / 0              | 5 / 3                                                                | 16 / 14            |                                                             |                 |                                                         |
| Autism                    | 10/6                                                         |                      | 19/16                                                           | 5 / 1                                                  |                    | 5 / 2                                                                |                    | 1 / 1                                                       |                 | 1 / 1                                                   |
| Ataxia/Motor              | 10/7                                                         | 14/7                 | 17/16                                                           | 3 / 3                                                  |                    | 4/4                                                                  | 13/12              | 1/1                                                         |                 |                                                         |
| Pyramidal                 | 3/0                                                          | 7/0                  | 8/8                                                             |                                                        |                    | 4 / 4                                                                | 12 / 9             | 1 / 1                                                       |                 |                                                         |
| Dyskinesias/Movement      | 2/1                                                          | 2/1                  | 7/3                                                             | 5 / 1                                                  | 2/0                | 2 / 2                                                                | 4 / 0              |                                                             |                 |                                                         |
| Epilepsy                  | 3/1                                                          | 6/1                  | 10/9                                                            | 4 / 2                                                  | 2 / 0              | 1 / 1                                                                | 5 / 5              | 1 / 1                                                       | 1 / 1           | 1 / 1                                                   |

Table S6. Studies examining only d,l-leucovorin in ASD, by year published

| Study, year                                    | Children                                                                                      | Study and dose                                                                                                             | Outcomes                                                                                                                 | Comment                                                                                   |
|------------------------------------------------|-----------------------------------------------------------------------------------------------|----------------------------------------------------------------------------------------------------------------------------|--------------------------------------------------------------------------------------------------------------------------|-------------------------------------------------------------------------------------------|
| Frye et., 2013 (Frye,<br>Sequeira et al. 2013) | 44 children with ASD,<br>ages 2-15 yo; 9 children<br>with ASD in a wait-list<br>control group | Prospective, case-control<br>study, d,l-leucovorin 2<br>mg/kg/day (max 50 mg<br>per day) over a mean<br>period of 4 months | Improvements in verbal<br>communication (p=0.011),<br>expressive language<br>(p=0.026), receptive<br>language (p=0.017), | Improvement compared to<br>a wait-list control group;<br>Minimal adverse effects<br>noted |



|                                                  |                                                         |                                                                                                                                         |                                                                                                                                                                                                                                                                                          |                                                                                                                              |
|--------------------------------------------------|---------------------------------------------------------|-----------------------------------------------------------------------------------------------------------------------------------------|------------------------------------------------------------------------------------------------------------------------------------------------------------------------------------------------------------------------------------------------------------------------------------------|------------------------------------------------------------------------------------------------------------------------------|
|                                                  |                                                         |                                                                                                                                         | attention (p=0.05) and stereotypy (p=0.009)                                                                                                                                                                                                                                              |                                                                                                                              |
| Frye, 2018 (Frye, Slattery et al. 2018)          | 48 children with ASD (mean age 7 yo; 82% male)          | Double-blind, placebo-controlled; 12 weeks of <i>d,l</i> -leucovorin 2 mg/kg/day (max 50 mg/day) in 23 children; placebo in 25 children | Improvement in verbal communication (p=0.02) with medium-large effect size; VABS daily living (p=0.05); ABC irritability (p=0.04), ABC social withdrawal (p=0.02), ABC stereotypy (p=0.007), ABC hyperactivity (p=0.02), and ABC inappropriate speech (p=0.004); ASQ stereotypy (p=0.02) | Children with FRα autoantibodies had more significant improvements; no significant differences in adverse events in 2 groups |
| Renard, 2020 (Renard, Leheup et al. 2020)        | 19 children with ASD                                    | Single-blind, placebo-controlled; <i>d,l</i> -leucovorin 0.29-0.63 mg/kg/day in 9 children; placebo in 10 children                      | ADOS global score (p=0.02) and social interaction (p=0.019) improved in treated group compared to controls                                                                                                                                                                               | No serious adverse events                                                                                                    |
| Bent et al., 2020 (Bent, Chen et al. 2020)       | 12 patients with ASD, Ages 13-19 yo (10 boys, 2 girls)  | Prospective, open label, <i>d,l</i> -leucovorin 2 mg/kg/day (max 50 mg/day) for 12 weeks                                                | ABC: 2.4-point improvement (p=0.56)<br>SRS: 7.8-point improvement (p=0.095)<br>PedsQL: 0.8-point worsening (p=0.69)                                                                                                                                                                      | Limitations included heterogenous population and small sample size. Generally, well tolerated.                               |
| Adams et al., 2021 (Adams, Bhargava et al. 2021) | 1,286 participants with ASD or their parents/caregivers | Survey of treatments including <i>d,l</i> -leucovorin                                                                                   | Folinic acid (more than 5 mg/day orally) improved cognition in 33%, attention in 29%, and language/communication in 24%. Moderate dose folinic acid (below 5 mg/day orally) improved language/communication (20%)                                                                        | Minimal adverse effects reported                                                                                             |

Autism Diagnostic Observation Schedule (ADOS)

Table S7. Studies examining *d,l*-leucovorin along with other supplements or treatments in ASD, by year published

| Study, year                                    | Children                                                                            | Study and dose                                                                                                           | Outcomes                                                                                                                                                                                                                                                                                                                           | Comment                                                                                                                                                                              |
|------------------------------------------------|-------------------------------------------------------------------------------------|--------------------------------------------------------------------------------------------------------------------------|------------------------------------------------------------------------------------------------------------------------------------------------------------------------------------------------------------------------------------------------------------------------------------------------------------------------------------|--------------------------------------------------------------------------------------------------------------------------------------------------------------------------------------|
| James et al., 2004 (James, Cutler et al. 2004) | 8 children with ASD                                                                 | Prospective, open label, 800 µg of <i>d,l</i> -leucovorin plus 1000 mg of betaine twice a day for 4 months               | Increases in methionine, SAM, homocysteine, cystathionine, cysteine, and tGSH concentrations and SAM:SAH and tGSH:GSSG; improvements in speech and cognition                                                                                                                                                                       | Clinical improvements noted by attending physician by not formally quantified                                                                                                        |
| James et al., 2009 (James, Melnyk et al. 2009) | 40 children with ASD                                                                | Prospective, open label, 400 µg <i>d,l</i> -leucovorin twice a day and 75 µg/kg methylcobalamin injected twice a week    | Significant increases in cysteine, cysteinylglycine, and glutathione concentrations ( $p<0.001$ )                                                                                                                                                                                                                                  | Side effects included hyperactivity and reduced sleep                                                                                                                                |
| Adams, 2011 (Adams, Audhya et al. 2011)        | 141 children with ASD; 72 received MVI/minerals; 69 received placebo                | Double-blind, placebo-controlled study; MVI containing 550 µg of <i>d,l</i> -leucovorin per day for 3 months             | Improvements in PGI-R overall ( $p=0.02$ ), hyperactivity ( $p=0.003$ ), tantrumming ( $p=0.009$ ), and receptive language ( $p=0.03$ )                                                                                                                                                                                            | MVI/minerals contained vitamins A, D, E, K, B1-B6, B12, CoQ10, and minerals                                                                                                          |
| Frye et al., 2013 (Frye, Melnyk et al. 2013)   | 40 children with ASD; 37 analyzed                                                   | Prospective, open label, 400 µg <i>d,l</i> -leucovorin twice a day and 75 µg/kg methylcobalamin injected twice a week    | Significant improvements in receptive ( $p=0.001$ ), expressive ( $p<0.0001$ ) and written ( $p<0.005$ ) communication skills; personal ( $p<0.0005$ ), domestic ( $p<0.05$ ) and community ( $p<0.005$ ) daily living skills; and interpersonal ( $p<0.05$ ), play-leisure ( $p=0.001$ ), and coping ( $p=0.0005$ ) social skills | Additional analysis of James, 2009 (James, Melnyk et al. 2009). Side effects included hyperactivity (14%), reduced sleep (7%), insomnia (2%), impulsivity (2%) and irritability (2%) |
| Adams et al., 2018 (Adams, Audhya et al. 2018) | 67 individuals with ASD (ages 3-58 yo); 37 received MVI/minerals; 30 were untreated | Prospective controlled study; MVI containing <i>d,l</i> -leucovorin, folic acid and 5MTHF (600 µg) per day for 12 months | Improvements in non-verbal IQ ( $p=0.009$ ); CARS score ( $p=0.03$ ), VABS-II communication ( $p=0.01$ ), daily living skills ( $p=0.007$ ), and social skills ( $p=0.05$ )                                                                                                                                                        | MVI/minerals contained vitamins A, D, E, K, B1-B6, B12, CoQ10, and minerals; 2 children had worsening behaviors                                                                      |

|                                                          |                                                                                                                                 |                                                                                              |                                                                                                                                                                               |                                                                     |
|----------------------------------------------------------|---------------------------------------------------------------------------------------------------------------------------------|----------------------------------------------------------------------------------------------|-------------------------------------------------------------------------------------------------------------------------------------------------------------------------------|---------------------------------------------------------------------|
| Ramaekers et al., 2019 (Ramaekers, Sequeira et al. 2019) | 166 patients with ASD, ages 1-16 yo (82 treated; 84 untreated, matched for age, gender, CARS score and FRα autoantibody status) | Prospective open label, controlled study; <i>d,l</i> -leucovorin 0.5-2 mg/kg/day for 2 years | Compared to untreated control group, <i>d,l</i> -leucovorin led to improvements in CARS scores from severe ASD to mild or moderate ASD; 17/82 (20.7%) had "complete recovery" | Other nutritional deficiency corrected during the study period      |
| Batebi (Batebi, Moghaddam et al. 2021)                   | 28 children with ASD treated (mean age 8.36±1.81); 27 children with ASD receiving placebo (7.52±1.84)                           | <i>d,l</i> -leucovorin 2 mg/kg/day up to 50 mg per day added to risperidone                  | Improvements in ABC-C stereotypy (p=0.034), hyperactivity/noncompliance (p=0.03)                                                                                              | Common side effects were increase appetite (25%) and diarrhea (18%) |

Parental Global Impressions-Revised (PGI-R)

## References

- Adams, J. B., T. Audhya, E. Geis, E. Gehn, V. Fimbres, E. L. Pollard, J. Mitchell, J. Ingram, R. Hellmers, D. Laake, J. S. Matthews, K. Li, J. C. Naviaux, R. K. Naviaux, R. L. Adams, D. M. Coleman and D. W. Quig (2018). "Comprehensive Nutritional and Dietary Intervention for Autism Spectrum Disorder-A Randomized, Controlled 12-Month Trial." *Nutrients* 10(3).
- Adams, J. B., T. Audhya, S. McDonough-Means, R. A. Rubin, D. Quig, E. Geis, E. Gehn, M. Loresto, J. Mitchell, S. Atwood, S. Barnhouse and W. Lee (2011). "Effect of a vitamin/mineral supplement on children and adults with autism." *BMC Pediatr* 11: 111.
- Adams, J. B., A. Bhargava, D. M. Coleman, R. E. Frye and D. A. Rossignol (2021). "Ratings of the Effectiveness of Nutraceuticals for Autism Spectrum Disorders: Results of a National Survey." *J Pers Med* 11(9): 878.
- Al-Baradie, R. S. and M. W. Chaudhary (2014). "Diagnosis and management of cerebral folate deficiency. A form of folinic acid-responsive seizures." *Neurosciences (Riyadh)* 19(4): 312-316.
- Batebi, N., H. S. Moghaddam, A. Hasanzadeh, Y. Fakour, M. R. Mohammadi and S. Akhondzadeh (2021). "Folinic Acid as Adjunctive Therapy in Treatment of Inappropriate Speech in Children with Autism: A Double-Blind and Placebo-Controlled Randomized Trial." *Child Psychiatry Hum Dev* 52(5): 928-938.
- Bent, S., Y. Chen, M. G. McDonald, F. Widjaja, J. Wahlberg and R. L. Hendren (2020). "An Examination of Changes in Urinary Metabolites and Behaviors with the Use of Leucovorin Calcium in Children with Autism Spectrum Disorder (ASD)." *Advances in Neurodevelopmental Disorders* 4(3): 241-246.
- Frye, R. E., L. Delhey, J. Slattery, M. Tippet, R. Wynne, S. Rose, S. G. Kahler, S. C. Bennuri, S. Melnyk, J. M. Sequeira and E. Quadros (2016). "Blocking and Binding Folate Receptor Alpha Autoantibodies Identify Novel Autism Spectrum Disorder Subgroups." *Front Neurosci* 10: 80.
- Frye, R. E., S. Melnyk, G. Fuchs, T. Reid, S. Jernigan, O. Pavliv, A. Hubanks, D. W. Gaylor, L. Walters and S. J. James (2013). "Effectiveness of methylcobalamin and folinic Acid treatment on adaptive behavior in children with autistic disorder is related to glutathione redox status." *Autism Res Treat* 2013: 609705.
- Frye, R. E. and R. K. Naviaux (2011). "Autistic disorder with complex IV overactivity: a new mitochondrial syndrome." *Journal of Pediatric Neurology* 9(4): 427-434.
- Frye, R. E., J. M. Sequeira, E. V. Quadros, S. J. James and D. A. Rossignol (2013). "Cerebral folate receptor autoantibodies in autism spectrum disorder." *Mol Psychiatry* 18(3): 369-381.
- Frye, R. E., J. M. Sequeira, E. V. Quadros and D. A. Rossignol (2014). "Folate Receptor Alpha Autoantibodies Modulate Thyroid Function in Autism Spectrum Disorder." *N A J Med Sci* 7(2): 53-56.
- Frye, R. E., J. Slattery, L. Delhey, B. Furgerson, T. Strickland, M. Tippet, A. Sailey, R. Wynne, S. Rose, S. Melnyk, S. Jill James, J. M. Sequeira and E. V. Quadros (2018). "Folinic acid improves verbal communication in children with autism and language impairment: a randomized double-blind placebo-controlled trial." *Mol Psychiatry* 23(2): 247-256.
- Frye, R. E., R. Wynne, S. Rose, J. Slattery, L. Delhey, M. Tippet, S. G. Kahler, S. C. Bennuri, S. Melnyk, J. M. Sequeira and E. V. Quadros (2017). "Thyroid dysfunction in children with autism spectrum disorder is associated with folate receptor alpha autoimmune disorder." *J Neuroendocrinol* 29(3).

14. James, S. J., P. Cutler, S. Melnyk, S. Jernigan, L. Janak, D. W. Gaylor and J. A. Neubrandner (2004). "Metabolic biomarkers of increased oxidative stress and impaired methylation capacity in children with autism." Am J Clin Nutr 80(6): 1611-1617.
15. James, S. J., S. Melnyk, G. Fuchs, T. Reid, S. Jernigan, O. Pavliv, A. Hubanks and D. W. Gaylor (2009). "Efficacy of methylcobalamin and folinic acid treatment on glutathione redox status in children with autism." Am J Clin Nutr 89(1): 425-430.
16. Kanmaz, S., E. Simsek, S. Yilmaz, A. Durmaz, H. M. Serin and S. Gokben (2021). "Cerebral folate transporter deficiency: a potentially treatable neurometabolic disorder." Acta Neurol Belg.
17. Moretti, P., S. U. Peters, D. Del Gaudio, T. Sahoo, K. Hyland, T. Bottiglieri, R. J. Hopkin, E. Peach, S. H. Min, D. Goldman, B. Roa, C. A. Bacino and F. Scaglia (2008). "Brief report: autistic symptoms, developmental regression, mental retardation, epilepsy, and dyskinesias in CNS folate deficiency." J Autism Dev Disord 38(6): 1170-1177.
18. Moretti, P., T. Sahoo, K. Hyland, T. Bottiglieri, S. Peters, D. del Gaudio, B. Roa, S. Curry, H. Zhu, R. H. Finnell, J. L. Neul, V. T. Ramaekers, N. Blau, C. A. Bacino, G. Miller and F. Scaglia (2005). "Cerebral folate deficiency with developmental delay, autism, and response to folinic acid." Neurology 64(6): 1088-1090.
19. Quadros, E. V., J. M. Sequeira, W. T. Brown, C. Mevs, E. Marchi, M. Flory, E. C. Jenkins, M. T. Velinov and I. L. Cohen (2018). "Folate receptor autoantibodies are prevalent in children diagnosed with autism spectrum disorder, their normal siblings and parents." Autism Res 11(5): 707-712.
20. Ramaekers, V. T. and N. Blau (2004). "Cerebral folate deficiency." Dev Med Child Neurol 46(12): 843-851.
21. Ramaekers, V. T., N. Blau, J. M. Sequeira, M. C. Nassogne and E. V. Quadros (2007). "Folate receptor autoimmunity and cerebral folate deficiency in low-functioning autism with neurological deficits." Neuropediatrics 38(6): 276-281.
22. Ramaekers, V. T., E. V. Quadros and J. M. Sequeira (2013). "Role of folate receptor autoantibodies in infantile autism." Mol Psychiatry 18(3): 270-271.
23. Ramaekers, V. T., S. P. Rothenberg, J. M. Sequeira, T. Opladen, N. Blau, E. V. Quadros and J. Selhub (2005). "Autoantibodies to folate receptors in the cerebral folate deficiency syndrome." N Engl J Med 352(19): 1985-1991.
24. Ramaekers, V. T., J. M. Sequeira, N. Blau and E. V. Quadros (2008). "A milk-free diet downregulates folate receptor autoimmunity in cerebral folate deficiency syndrome." Dev Med Child Neurol 50(5): 346-352.
25. Ramaekers, V. T., J. M. Sequeira, M. DiDuca, G. Vrancken, A. Thomas, C. Philippe, M. Peters, A. Jadot and E. V. Quadros (2019). "Improving Outcome in Infantile Autism with Folate Receptor Autoimmunity and Nutritional Derangements: A Self-Controlled Trial." Autism Res Treat 2019: 7486431.
26. Ramaekers, V. T., J. M. Sequeira, B. Thony and E. V. Quadros (2020). "Oxidative Stress, Folate Receptor Autoimmunity, and CSF Findings in Severe Infantile Autism." Autism Res Treat 2020: 9095284.
27. Renard, E., B. Leheup, R. M. Gueant-Rodriguez, A. Oussalah, E. V. Quadros and J. L. Gueant (2020). "Folinic acid improves the score of Autism in the EFFET placebo-controlled randomized trial." Biochimie 173: 57-61.
28. Shoffner, J., L. Hyams, G. N. Langley, S. Cossette, L. Mylacraine, J. Dale, L. Ollis, S. Kuoch, K. Bennett, A. Aliberti and K. Hyland (2010). "Fever plus mitochondrial disease could be risk factors for autistic regression." J Child Neurol 25(4): 429-434.
29. Shoffner, J., B. Trommer, A. Thurm, C. Farmer, W. A. Langley, 3rd, L. Soskey, A. N. Rodriguez, P. D'Souza, S. J. Spence, K. Hyland and S. E. Swedo (2016). "CSF concentrations of 5-methyltetrahydrofolate in a cohort of young children with autism." Neurology 86(24): 2258-2263.
